# Supplementary material for: Metabolic Analysis and Renal Protective Effects of Linagliptin and Empagliflozin in Alport Syndrome
Source: PubMed Central journal article supplement (PMC11296534; doi:10.34067/kid.0000000000000472), 2024-05-23
Supplement: kidney360-5-1002-s002.pdf [file kidney360-5-1002-s002.pdf]

## **Table of Contents for the Supplemental Material**

Supplemental Methods

Supplemental Figure 1

Supplemental Figure 2

Supplemental Figure 3

Supplemental Table 1

Supplemental Table 2

Reference

## **Supplemental Methods**

### **Urinary albumin-to-creatinine ratios**

Morning spot urine samples were collected bi-weekly. Urinary albumin-to-creatinine ratios were determined using the Mouse Albumin ELISA Kit (Bethyl Laboratories) and Creatinine LiquiColor (Stanbio). The albuminuria values are expressed as  $\mu\text{g}$  of albumin per mg of creatinine.

### **Kidney histology analysis**

Perfused kidneys were fixed in 10% formalin, paraffin-embedded, and cut into 4  $\mu\text{m}$  thick sections. To investigate mesangial expansion, periodic acid-Schiff (PAS) staining was conducted using a standard protocol. Mesangial expansion was visualized under a light microscope (Olympus BX41, Tokyo, Japan), and semi-quantitative analysis (scored on a scale of 0-5) was performed in a blinded manner, examining 10 glomeruli per section.

To measure fibrosis, Picrosirius Red staining was performed. Paraffin-embedded sections were deparaffinized using xylene and a graded alcohol series. The sections were then stained with Picrosirius Red in saturated aqueous picric acid for 1 hour. After staining, the sections were examined under a light microscope (Olympus BX41, Tokyo, Japan), followed by analysis using Fiji/Image J.

### **Immunofluorescence staining**

To measure podocyte number per glomerulus, glomerular sections embedded in OCT were stained with a Wilms tumor 1 (WT1) antibody (Santa Cruz Biotechnology, Dallas, TX, sc-192, 1:300), followed by a secondary antibody (Invitrogen, Waltham, MA, A-11008, 1:500) and Mounting Medium with DAPI (Vectorlabs, Newark, CA, H-1200). To study the localization of DPP4, kidney cortex sections were stained with Synaptopodin (Santa Cruz Biotechnology, Dallas, TX, sc-515842, 1:100) and DPP4 (Cell Signaling Technology, Danvers, MA, 67138, 1:100) with secondary antibodies (Invitrogen, Waltham, MA, A-11001 & A-21244, 1:500). Images were acquired using Olympus IX81 confocal microscope (Tokyo, Japan) coupled with a 60 x oil immersion objective lens and images were processed using Fiji/Image J.

## **Cell culture**

The establishment of conditionally immortalized mouse podocyte and tubular cell lines has been previously described<sup>1,2</sup>. In brief, the immortalized cell lines were cultured in RPMI growth medium containing 10% FBS, 1% penicillin/streptomycin, and 100 U/ml IFN $\gamma$  at 33 °C under permissive conditions. Podocyte cell lines were shifted to non-permissive conditions at 37 °C without IFN $\gamma$  for 12 days. For the experiments, the cultured cells were incubated with 50 nM linagliptin (Selleckchem, Houston, TX) or dimethylsulfoxide in the growth medium for 48 hours.

## **Western blot analysis**

Cell lysates were prepared using a 3-[(3-cholamidopropyl)dimethylammonio]-1-propanesulfonic (CHAPS) acid buffer. The protein concentration was determined using the bicinchoninic acid (BCA) reagent from Thermo Scientific. Subsequently, 20  $\mu$ g of protein extract was loaded onto SDS-polyacrylamide gel electrophoresis (SDS-PAGE) gels (Bio-Rad) with a concentration range of 4 to 20%. The gel transfer was conducted using the Trans-Blot Turbo Transfer System (Bio-Rad). For Western blot analysis, a standard protocol was followed, utilizing primary antibodies DPP4 (Cell Signaling Technology, #67138, 1:1,000) and GAPDH (Sigma-Aldrich, CB1001, 1:10,000), along with secondary antibodies including anti-mouse IgG horseradish peroxidase (HRP) (Promega, W402B, 1:10,000) and anti-rabbit IgG HRP (Promega, W401B, 1:10,000). The signal was detected using Radiance ECL (Azure, Dublin, CA) and captured using the Azure c600 Imaging System.

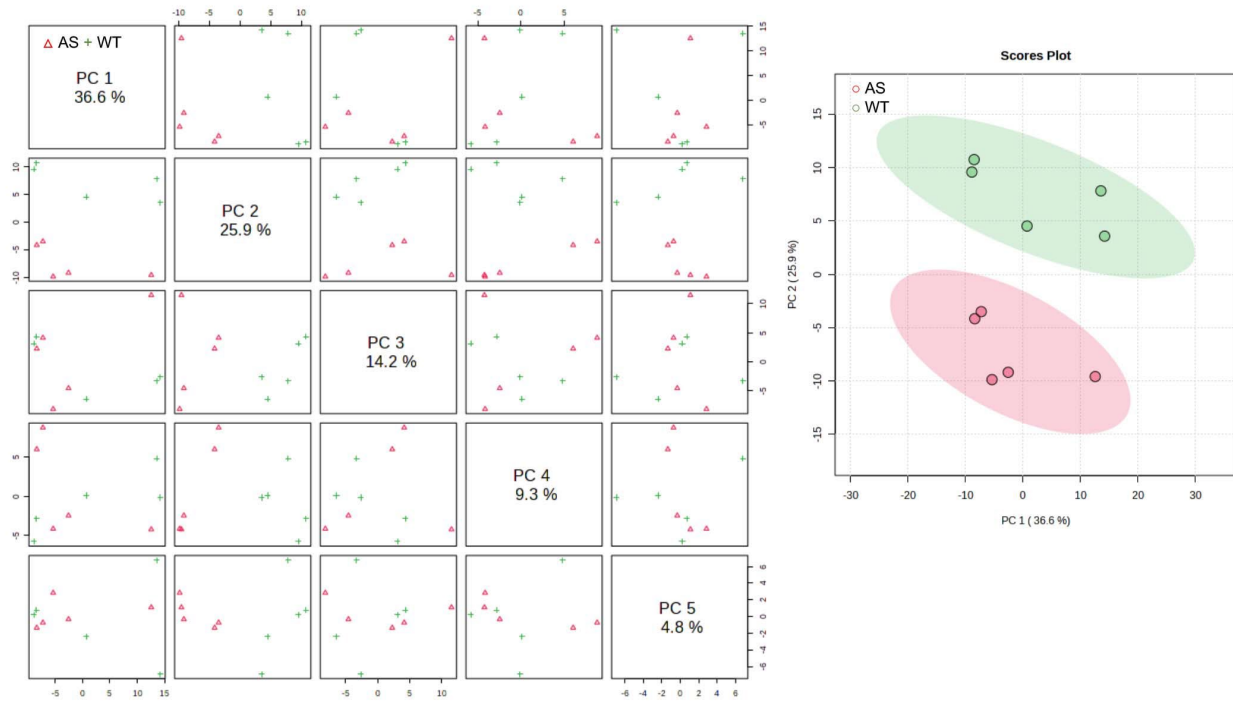

Supplemental Figure 1. Alport (AS) and wildtype (WT) kidney metabolites distinctly cluster together in principal component (PC) analysis.

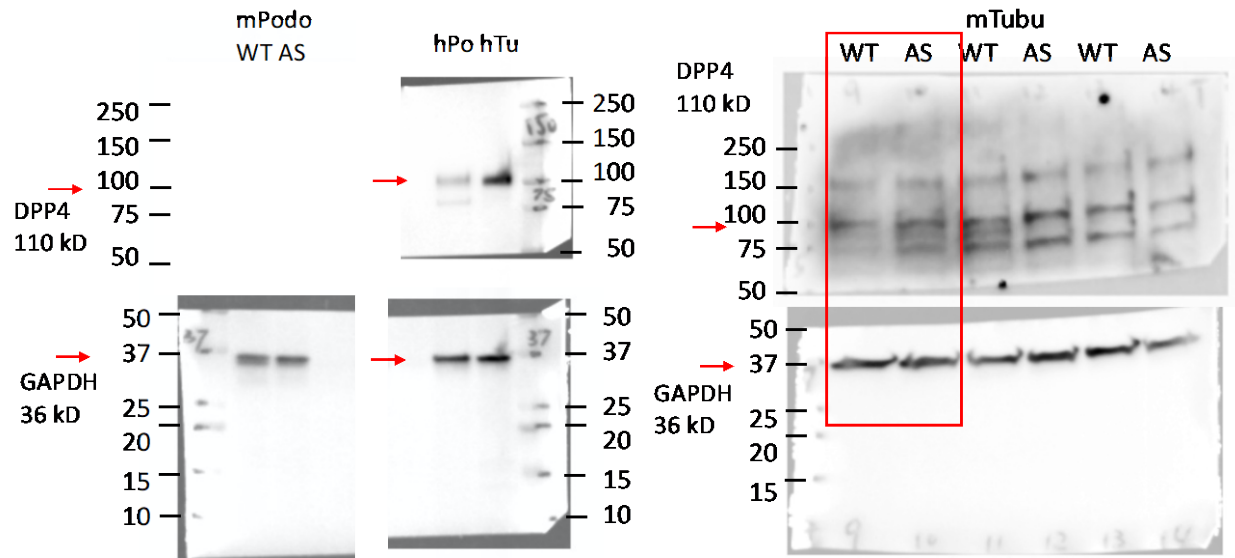

Supplemental Figure 2. Full Western Blot images with molecular weight markers.

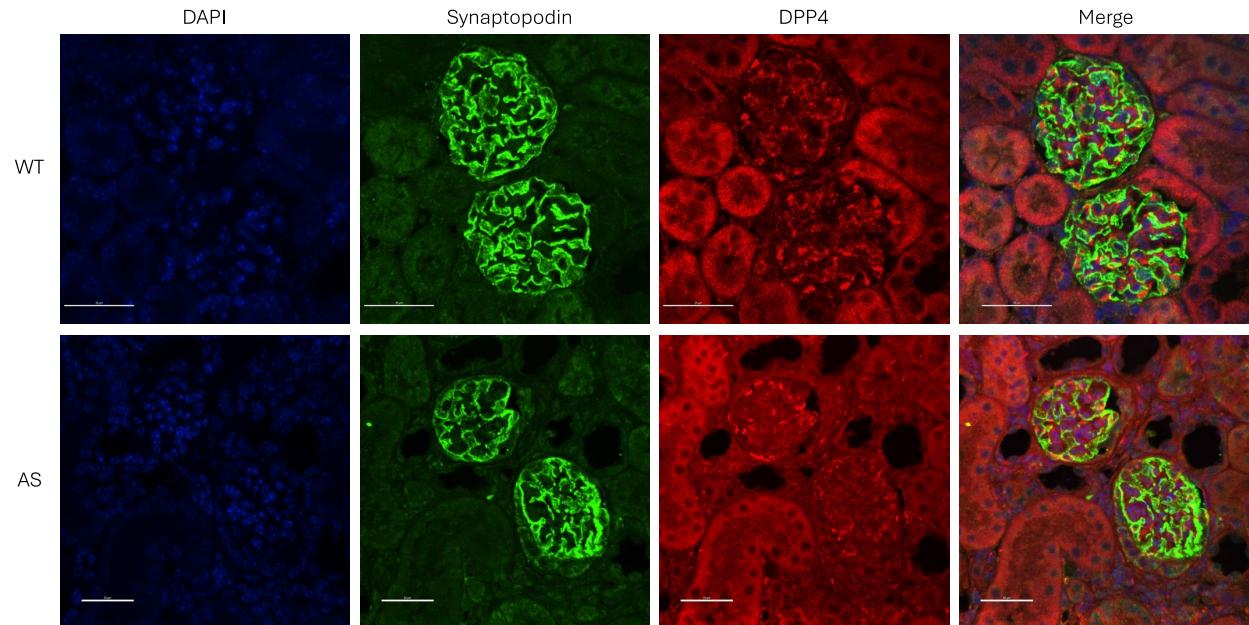

Supplemental Figure 3. Immunohistochemistry staining of mouse kidney cortex for DPP4 and Synaptopodin (scale bar: 35  $\mu$ m).

Supplemental Table 1. Abundance of key discriminant metabolites between Alport (AS) and wildtype (WT) kidneys. Student's t-test.

| Molecule ID                                 | Ion m/z  | AS Average  | WT Average  |
|---------------------------------------------|----------|-------------|-------------|
| Adrenic Acid                                | 331.2642 | 1118.013456 | 406.2930215 |
| Eicosapentaenoic Acid                       | 301.2172 | 163.229433  | 211.6954267 |
| Glucose                                     | 179.056  | 2723.955544 | 1075.3206   |
| Citrulline                                  | 174.0883 | 107.1515556 | 0.316354536 |
| Glycerophosphoethanolamine, PE(P-18:0/22:4) | 778.5755 | 101.5468642 | 31.93592818 |
| Phosphatidylglycerol, PG(22:6/22:6)         | 865.5024 | 57.85675239 | 2.354584286 |
| Glutamine                                   | 145.0618 | 1211.21242  | 558.2280067 |
| Lysophosphatidylcholine, lysoPE(18:0)       | 480.3095 | 1674.114453 | 2563.706143 |
| Lysophosphatidic acid, lysoPA(16:0)         | 409.236  | 695.8214084 | 1123.194421 |
| Phosphoinositol, PI(40:6)                   | 909.5498 | 135.229226  | 403.1758867 |
| Phenylacetyl glycine                        | 192.0665 | 270.475026  | 1.105155496 |
| Phosphoserine, PS(40:7)                     | 832.5133 | 64.96968096 | 119.1457542 |
| Tetracosanoic Acid                          | 367.3581 | 8.767387995 | 2.397266403 |
| Glucose-6-Phosphate                         | 259.0224 | 3012.327431 | 3729.160625 |
| Lysophosphoethanolamine, lysoPE(18:1)       | 478.2938 | 261.6966881 | 452.4192478 |
| Citric Acid                                 | 191.0196 | 1740.128829 | 235.368345  |
| Eicosenoic Acid                             | 309.2798 | 175.0464396 | 85.78896464 |
| Uridine                                     | 243.0622 | 281.6797974 | 23.74957194 |
| PE (3:0/18:4)                               | 528.2731 | 2984.677811 | 1990.755871 |

Supplemental Table 2. Mean ion intensity of the treatment group.

|                       | AS         | AS+L        | AS+E        | AS+L+E      |
|-----------------------|------------|-------------|-------------|-------------|
| Adrenic Acid          | 1118±212   | 1562±299.4  | 1345±253    | 952.5±398.8 |
| Eicosapentaenoic Acid | 163.2±6.05 | 145.8±27.53 | 152.8±55.06 | 110.3±47.4  |
| Glucose               | 2724±461.8 | 3546±1088   | 3640±1223   | 3893±241.9  |

Values are presented as Mean ± SD.



## Reference

1. Ge M, Molina J, Kim JJ, et al. Empagliflozin reduces podocyte lipotoxicity in experimental Alport syndrome. *Elife*. May 2 2023;12. doi: 10.7554/eLife.83353.
2. Kim J-J, David JM, Wilbon SS, et al. Discoidin domain receptor 1 activation links extracellular matrix to podocyte lipotoxicity in Alport syndrome. *EBioMedicine*. 2021/01/01/2021;63:103162. doi: <https://doi.org/10.1016/j.ebiom.2020.103162>.
